# Supplementary material for: σ Bond activation through tunneling: formation of the boron hydride cations BHn+ (n = 2, 4, 6)
Source: Royal Society of Chemistry journal article supplement (doi:10.1039/c5cp05505a), 2016-01-01
Supplement: c5cp05505a1.pdf [file c5cp05505a1.pdf]

**Supporting information for:**

**$\sigma$  Bond Activation Through Tunneling:**

**Formation of the Boron Hydride Cations  $\text{BH}_n^+$**

**$(n = 2, 4, 6)$**

Yudong Qiu, Chia-Hua Wu, Henry F. Schaefer III, Wesley D. Allen,\* and  
Jay Agarwal\*

*Center for Computational Quantum Chemistry*  
*University of Georgia*  
*Athens, Georgia 30602*

E-mail: wdallen@uga.edu; jagarwal@uga.edu

# Contents

|          |                                                                                                                             |            |
|----------|-----------------------------------------------------------------------------------------------------------------------------|------------|
| <b>1</b> | <b>Optimized Structures</b>                                                                                                 | <b>S2</b>  |
| <b>2</b> | <b>Focal Point Analyses</b>                                                                                                 | <b>S6</b>  |
| <b>3</b> | <b>Vibrational Frequencies</b>                                                                                              | <b>S9</b>  |
| 3.1      | CCSDTQ/CBS Geometries and Frequencies . . . . .                                                                             | S9         |
| 3.2      | CCSD(T) Harmonic and Fundamental Vibrational Frequencies . . . . .                                                          | S13        |
| <b>4</b> | <b>Molecular Orbital Analysis</b>                                                                                           | <b>S19</b> |
| <b>5</b> | <b>Intrinsic Reaction Coordinates</b>                                                                                       | <b>S22</b> |
| <b>6</b> | <b>Tunneling Analyses</b>                                                                                                   | <b>S26</b> |
| <b>7</b> | <b>Estimation of <math>[\text{B}(\text{H}_2)_3^+]/[\text{B}(\text{H}_2)_2^+]</math> Ratio under Experimental Conditions</b> | <b>S29</b> |
| <b>8</b> | <b>Details for the Active Space of <math>\text{BH}_2^+</math> PES</b>                                                       | <b>S31</b> |
| <b>9</b> | <b>Example Keywords and Parameters in Polyrate Calculations</b>                                                             | <b>S32</b> |

# 1 Optimized Structures

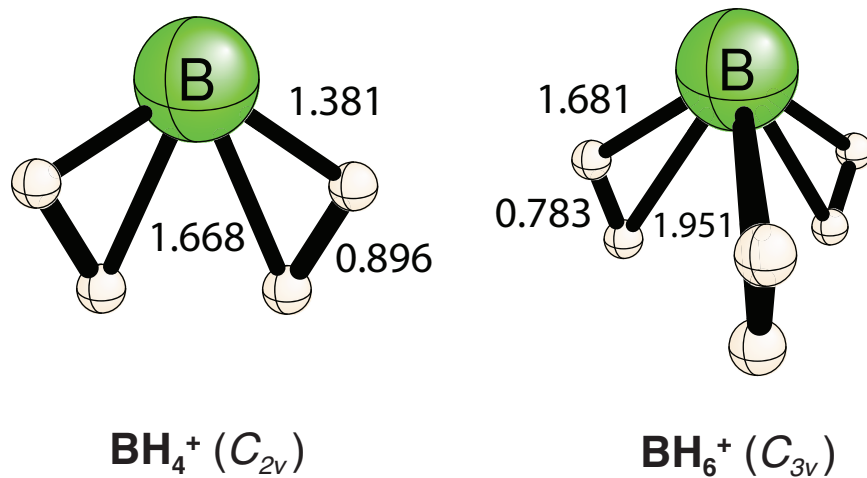

Figure S1: Optimized distances (Å) for the insertion transition states of  $\text{BH}_4^+$  ( $C_{2v}$ ) and  $\text{BH}_6^+$  ( $C_{3v}$ ) at the CCSD(T)/cc-pCV5Z level of theory.

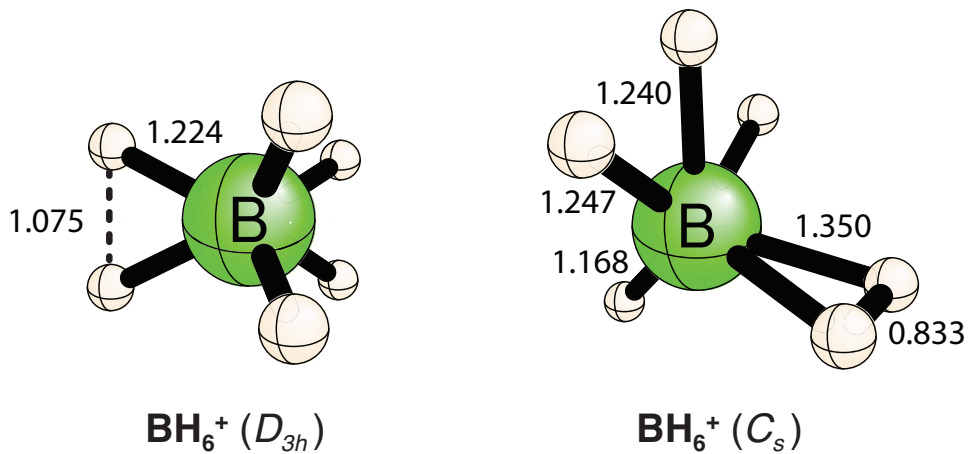

Figure S2: Optimized distances (Å) for the hydrogen scrambling transition states at the CCSD(T)/cc-pCV5Z level of theory.

Table S1: Optimized Cartesian coordinates ( $\text{\AA}$ ) of  $\text{B}(\text{H}_2)^+$  at CCSD(T)/cc-pCV5Z level of theory.

| Atoms | X        | Y         | Z         |
|-------|----------|-----------|-----------|
| B     | 0.000 00 | 0.000 00  | -0.345 00 |
| H     | 0.000 00 | -0.377 83 | 1.884 36  |
| H     | 0.000 00 | 0.377 83  | 1.884 36  |

Table S2: Optimized Cartesian coordinates ( $\text{\AA}$ ) of  $\text{B}(\text{H}_2)_2^+$  at CCSD(T)/cc-pCV5Z level of theory.

| Atoms | X         | Y         | Z         |
|-------|-----------|-----------|-----------|
| B     | 0.431 93  | 0.166 06  | 0.000 00  |
| H     | -1.711 31 | 0.865 90  | 0.377 25  |
| H     | -1.711 31 | 0.865 90  | -0.377 25 |
| H     | -0.313 16 | -1.947 83 | 0.000 00  |
| H     | -0.982 55 | -1.598 01 | 0.000 00  |

Table S3: Optimized Cartesian coordinates ( $\text{\AA}$ ) of  $\text{B}(\text{H}_2)_3^+$  at CCSD(T)/cc-pCV5Z level of theory.

| Atoms | X         | Y         | Z         |
|-------|-----------|-----------|-----------|
| B     | 0.000 00  | 0.000 00  | -0.542 26 |
| H     | 1.825 14  | 0.000 00  | 0.774 36  |
| H     | -0.912 57 | 1.580 62  | 0.774 36  |
| H     | -0.912 57 | -1.580 62 | 0.774 36  |
| H     | 1.394 59  | 0.450 64  | 1.200 14  |
| H     | -1.087 57 | 0.982 43  | 1.200 14  |
| H     | -0.307 03 | -1.433 07 | 1.200 14  |

Table S4: Optimized Cartesian coordinates ( $\text{\AA}$ ) of  $\text{HBH}^+$  at CCSD(T)/cc-pCV5Z level of theory.

| Atoms | X        | Y        | Z         |
|-------|----------|----------|-----------|
| B     | 0.000 00 | 0.000 00 | 0.000 00  |
| H     | 0.000 00 | 0.000 00 | -1.170 58 |
| H     | 0.000 00 | 0.000 00 | 1.170 58  |

Table S5: Optimized Cartesian coordinates ( $\text{\AA}$ ) of  $\text{HBH}(\text{H}_2)^+$  at CCSD(T)/cc-pCV5Z level of theory.

| Atoms | X         | Y        | Z         |
|-------|-----------|----------|-----------|
| B     | 0.000 00  | 0.000 00 | 0.129 91  |
| H     | 1.105 16  | 0.000 00 | 0.522 46  |
| H     | -1.105 16 | 0.000 00 | 0.522 46  |
| H     | -0.407 80 | 0.000 00 | -1.232 03 |
| H     | 0.407 80  | 0.000 00 | -1.232 03 |

Table S6: Optimized Cartesian coordinates ( $\text{\AA}$ ) of  $\text{HBH}(\text{H}_2)_2^+$  at CCSD(T)/cc-pCV5Z level of theory.

| Atoms | X         | Y         | Z         |
|-------|-----------|-----------|-----------|
| B     | 0.000 00  | 0.000 00  | -0.130 77 |
| H     | -1.035 01 | 0.000 00  | -0.698 84 |
| H     | 1.035 01  | 0.000 00  | -0.698 84 |
| H     | 0.411 66  | 1.004 65  | 0.706 54  |
| H     | -0.411 66 | 1.004 65  | 0.706 54  |
| H     | -0.411 66 | -1.004 65 | 0.706 54  |
| H     | 0.411 66  | -1.004 65 | 0.706 54  |

Table S7: Optimized Cartesian coordinates ( $\text{\AA}$ ) of  $\text{B}(\text{H}_2)_2^+$  insertion TS with  $C_{2v}$  symmetry at CCSD(T)/cc-pCV5Z level of theory.

| Atoms | X        | Y         | Z         |
|-------|----------|-----------|-----------|
| B     | 0.000 00 | 0.000 00  | -0.306 86 |
| H     | 0.000 00 | -1.150 03 | 0.457 88  |
| H     | 0.000 00 | 1.150 03  | 0.457 88  |
| H     | 0.000 00 | -0.675 65 | 1.218 19  |
| H     | 0.000 00 | 0.675 65  | 1.218 19  |

Table S8: Optimized Cartesian coordinates (Å) of  $\text{B}(\text{H}_2)_3^+$  insertion TS with  $C_{3v}$  symmetry at CCSD(T)/cc-pCV5Z level of theory.

| Atoms | X         | Y         | Z         |
|-------|-----------|-----------|-----------|
| B     | −0.434 50 | 0.000 00  | 0.000 00  |
| H     | 0.430 45  | −0.720 47 | −1.247 89 |
| H     | 0.430 45  | 1.440 94  | 0.000 00  |
| H     | 0.430 45  | −0.720 47 | 1.247 89  |
| H     | 1.151 69  | −0.568 04 | −0.983 87 |
| H     | 1.151 69  | 1.136 07  | 0.000 00  |
| H     | 1.151 69  | −0.568 04 | 0.983 87  |

Table S9: Optimized Cartesian coordinates (Å) of  $\text{HBH}(\text{H}_2)_2^+$  hydrogen scrambling TS with  $D_{3h}$  symmetry at CCSD(T)/cc-pCV5Z level of theory.

| Atoms | X         | Y         | Z         |
|-------|-----------|-----------|-----------|
| B     | 0.000 00  | 0.000 00  | 0.000 00  |
| H     | −0.952 65 | −0.537 71 | −0.550 01 |
| H     | −0.952 65 | 0.537 71  | −0.550 01 |
| H     | 0.000 00  | 0.537 71  | 1.100 02  |
| H     | 0.000 00  | −0.537 71 | 1.100 02  |
| H     | 0.952 65  | −0.537 71 | −0.550 01 |
| H     | 0.952 65  | 0.537 71  | −0.550 01 |

Table S10: Optimized Cartesian coordinates (Å) of  $\text{HBH}(\text{H}_2)_2^+$  hydrogen scrambling TS with  $C_s$  symmetry at CCSD(T)/cc-pCV5Z level of theory.

| Atoms | X         | Y         | Z         |
|-------|-----------|-----------|-----------|
| B     | 0.033 31  | −0.113 32 | 0.000 00  |
| H     | 0.185 40  | −1.271 85 | 0.000 00  |
| H     | 0.787 86  | 0.871 08  | 0.000 00  |
| H     | −1.157 36 | 0.367 59  | −0.416 38 |
| H     | −1.157 36 | 0.367 59  | 0.416 38  |
| H     | 0.488 78  | 0.451 75  | −1.014 37 |
| H     | 0.488 78  | 0.451 75  | 1.014 37  |

## 2 Focal Point Analyses

Table S11: Focal point analysis for the energies of the stationary points on the  $\text{BH}_2^+$  PES relative to the reactant  $\text{B}(\text{H}_2)^+$  ( $\Delta E$ , kcal mol $^{-1}$ ).<sup>a</sup>

| Basis Set                                             | $\Delta E_e[\text{CAS}(2,2)]$ | $\delta[\text{Mk-MRPT2}^b]$ | $\delta[\text{Mk-MRCCSD}]$ | $\delta[\text{Mk-MRCCSD(T)}]$ | $\Delta E_e[\text{Mk-MRCCSD(T)}]$ |
|-------------------------------------------------------|-------------------------------|-----------------------------|----------------------------|-------------------------------|-----------------------------------|
| (a) $\text{B}(\text{H}_2)^+ \rightarrow \text{TS}$    |                               |                             |                            |                               |                                   |
| cc-pCVDZ                                              | +48.18                        | +8.71                       | +8.51                      | −1.90                         | [+63.50]                          |
| cc-pCVTZ                                              | +48.35                        | +8.81                       | +7.77                      | −2.24                         | [+62.69]                          |
| cc-pCVQZ                                              | +48.32                        | +8.50                       | +7.57                      | −2.34                         | [+62.06]                          |
| cc-pCV5Z                                              | +48.28                        | +8.48                       | +7.50                      | −2.36                         | [+61.89]                          |
| cc-pCV6Z                                              | +48.27                        | +8.47                       | +7.47                      | −2.37                         | [+61.83]                          |
| CBS limit                                             | [+48.27]                      | [+8.45]                     | [+7.43]                    | [−2.38]                       | [+61.76]                          |
| $\Delta E = 61.76 - 3.42 = +58.34$ kcal mol $^{-1}$   |                               |                             |                            |                               |                                   |
| (b) $\text{B}(\text{H}_2)^+ \rightarrow \text{HBH}^+$ |                               |                             |                            |                               |                                   |
| cc-pCVDZ                                              | −55.27                        | −3.03                       | +5.93                      | +0.09                         | [−52.28]                          |
| cc-pCVTZ                                              | −55.90                        | −6.44                       | +5.22                      | +0.14                         | [−56.98]                          |
| cc-pCVQZ                                              | −55.90                        | −7.80                       | +5.29                      | +0.19                         | [−58.22]                          |
| cc-pCV5Z                                              | −55.91                        | −8.22                       | +5.40                      | +0.21                         | [−58.52]                          |
| cc-pCV6Z                                              | −55.91                        | −8.41                       | +5.46                      | +0.22                         | [−58.64]                          |
| CBS limit                                             | [−55.91]                      | [−8.68]                     | [+5.55]                    | [+0.22]                       | [−58.81]                          |
| $\Delta E = -58.81 + 3.65 = -55.16$ kcal mol $^{-1}$  |                               |                             |                            |                               |                                   |

<sup>a</sup>Geometries used in this table were optimized at FCI/cc-pVTZ level of theory. The symbol  $\delta$  denotes the increment in the relative energy with respect to the preceding level of theory in the hierarchy CASSCF→Mk-MRPT2→Mk-MRCCSD→Mk-MRCCSD(T). Square brackets signify results obtained from basis set extrapolations. Each final relative energy  $\Delta E$  is the sum of  $\Delta E_e[\text{Mk-MRCCSD(T)}/\text{CBS}]$  and  $\Delta_{\text{ZPVE}}[\text{FCI}/\text{cc-pVTZ}]$ , listed in order.

<sup>b</sup>Evangelista, F. A.; Simmonett, A. C.; Schaefer, H. F. *Phys. Chem. Chem. Phys.* **2009**, 11(23), 4728-4741.

Table S12: Focal point analysis for the energies of the stationary points on the  $\text{BH}_4^+$  PES relative to the reactant  $\text{B}(\text{H}_2)_2^+$  ( $\Delta E$ , kcal mol $^{-1}$ ).<sup>a</sup>

| Basis Set                                                           | $\Delta E_e[\text{HF}]$ | $\delta[\text{MP2}]$ | $\delta[\text{CCSD}]$ | $\delta[\text{CCSD}(\text{T})]$ | $\delta[\text{CCSDT}]$ | $\delta[\text{CCSDT}(\text{Q})]$ | $\delta[\text{CCSDTQ}]$ | $\Delta E_e[\text{CCSDTQ}]$ |
|---------------------------------------------------------------------|-------------------------|----------------------|-----------------------|---------------------------------|------------------------|----------------------------------|-------------------------|-----------------------------|
| (a) $\text{B}(\text{H}_2)_2^+ \rightarrow \text{TS}$                |                         |                      |                       |                                 |                        |                                  |                         |                             |
| cc-pCVDZ                                                            | +25.28                  | -15.39               | +5.01                 | -2.24                           | -0.43                  | -0.12                            | -0.02                   | [+12.09]                    |
| cc-pCVTZ                                                            | +26.56                  | -17.10               | +4.90                 | -2.74                           | -0.38                  | -0.15                            | [-0.02]                 | [+11.07]                    |
| cc-pCVQZ                                                            | +26.65                  | -17.91               | +4.93                 | -2.84                           | -0.35                  | [-0.15]                          | [-0.02]                 | [+10.31]                    |
| cc-pCV5Z                                                            | +26.65                  | -18.08               | +4.96                 | -2.86                           | [-0.35]                | [-0.15]                          | [-0.02]                 | [+10.14]                    |
| cc-pCV6Z                                                            | +26.65                  | -18.18               | +4.99                 | -2.87                           | [-0.35]                | [-0.15]                          | [-0.02]                 | [+10.06]                    |
| CBS limit                                                           | [+26.65]                | [-18.33]             | [+5.03]               | [-2.88]                         | [-0.35]                | [-0.15]                          | [-0.02]                 | [+9.94]                     |
| $\Delta E = 9.94 + 2.19 + 0.02 + 0.05 = +12.20$ kcal mol $^{-1}$    |                         |                      |                       |                                 |                        |                                  |                         |                             |
| (b) $\text{B}(\text{H}_2)_2^+ \rightarrow \text{HBH}(\text{H}_2)^+$ |                         |                      |                       |                                 |                        |                                  |                         |                             |
| cc-pCVDZ                                                            | -75.43                  | -1.12                | +10.01                | -0.29                           | -0.08                  | +0.00                            | +0.00                   | [-66.91]                    |
| cc-pCVTZ                                                            | -75.91                  | -4.62                | +8.70                 | -0.41                           | -0.07                  | +0.01                            | [+0.00]                 | [-72.30]                    |
| cc-pCVQZ                                                            | -75.99                  | -6.03                | +8.55                 | -0.39                           | -0.06                  | [+0.01]                          | [+0.00]                 | [-73.91]                    |
| cc-pCV5Z                                                            | -76.03                  | -6.39                | +8.57                 | -0.38                           | [-0.06]                | [+0.01]                          | [+0.00]                 | [-74.28]                    |
| cc-pCV6Z                                                            | -76.03                  | -6.56                | +8.59                 | -0.37                           | [-0.06]                | [+0.01]                          | [+0.00]                 | [-74.43]                    |
| CBS limit                                                           | [-76.03]                | [-6.81]              | [+8.62]               | [-0.37]                         | [-0.06]                | [+0.01]                          | [+0.00]                 | [-74.63]                    |
| $\Delta E = -74.63 + 7.50 - 0.03 + 0.11 = -67.05$ kcal mol $^{-1}$  |                         |                      |                       |                                 |                        |                                  |                         |                             |

<sup>a</sup>The symbol  $\delta$  denotes the increment in the relative energy with respect to the preceding level of theory in the hierarchy  $\text{HF} \rightarrow \text{MP2} \rightarrow \text{CCSD} \rightarrow \text{CCSD}(\text{T}) \rightarrow \text{CCSDT} \rightarrow \text{CCSDT}(\text{Q}) \rightarrow \text{CCSDTQ}$ .

Square brackets signify results obtained from basis set extrapolations or additivity assumptions.

<sup>b</sup>Each final relative energy  $\Delta E$  is the sum of  $\Delta E_e[\text{CCSDTQ}/\text{CBS}]$ ,  $\Delta_{\text{ZPVE}}[\text{CCSD}(\text{T})/\text{cc-pCVQZ}]$ ,  $\Delta_{\text{DBOC}}[\text{CCSD}/\text{cc-pCVQZ}]$ , and  $\Delta_{\text{rel}}[\text{CCSD}(\text{T})/\text{cc-pCVQZ}]$ , listed in order.



Table S13: Focal point analysis for the energies of the stationary points on the  $\text{BH}_6^+$  PES ( $\Delta E$ , kcal mol $^{-1}$ ).<sup>a</sup>

| Basis Set                                                             | $\Delta E_e[\text{HF}]$ | $\delta[\text{MP2}]$ | $\delta[\text{CCSD}]$ | $\delta[\text{CCSD(T)}]$ | $\delta[\text{CCSDT}]$ | $\delta[\text{CCSDT(Q)}]$ | $\delta[\text{CCSDTQ}]$ | $\Delta E_e[\text{CCSDTQ}]$ |
|-----------------------------------------------------------------------|-------------------------|----------------------|-----------------------|--------------------------|------------------------|---------------------------|-------------------------|-----------------------------|
| (a) $\text{B}(\text{H}_2)_3^+ \rightarrow C_{3v}$ insertion TS        |                         |                      |                       |                          |                        |                           |                         |                             |
| cc-pCVDZ                                                              | +12.92                  | -10.17               | +3.18                 | -1.62                    | -0.30                  | -0.06                     | -0.01                   | [+3.92]                     |
| cc-pCVTZ                                                              | +13.79                  | -11.70               | +3.16                 | -2.06                    | -0.29                  | -0.10                     | [-0.01]                 | [+2.79]                     |
| cc-pCVQZ                                                              | +13.92                  | -12.18               | +3.18                 | -2.15                    | -0.27                  | [-0.10]                   | [-0.01]                 | [+2.39]                     |
| cc-pCV5Z                                                              | +13.92                  | -12.31               | +3.20                 | -2.17                    | [-0.27]                | [-0.10]                   | [-0.01]                 | [+2.27]                     |
| cc-pCV6Z                                                              | +13.92                  | -12.38               | +3.22                 | -2.18                    | [-0.27]                | [-0.10]                   | [-0.01]                 | [+2.21]                     |
| CBS limit                                                             | [+13.92]                | [-12.49]             | [+3.25]               | [-2.19]                  | [-0.27]                | [-0.10]                   | [-0.01]                 | [+2.12]                     |
| $\Delta E = 2.12 + 2.42 - 0.01 + 0.03 = +4.55$ kcal mol $^{-1}$       |                         |                      |                       |                          |                        |                           |                         |                             |
| (b) $\text{B}(\text{H}_2)_3^+ \rightarrow \text{HBH}(\text{H}_2)_2^+$ |                         |                      |                       |                          |                        |                           |                         |                             |
| cc-pCVDZ                                                              | -84.20                  | -10.63               | +11.14                | -0.88                    | -0.10                  | -0.01                     | +0.00                   | [-84.69]                    |
| cc-pCVTZ                                                              | -84.82                  | -15.42               | +10.03                | -1.32                    | -0.08                  | -0.01                     | [+0.00]                 | [-91.61]                    |
| cc-pCVQZ                                                              | -84.87                  | -17.24               | +9.89                 | -1.36                    | -0.06                  | [-0.01]                   | [+0.00]                 | [-93.65]                    |
| cc-pCV5Z                                                              | -84.91                  | -17.66               | +9.91                 | -1.36                    | [-0.06]                | [-0.01]                   | [+0.00]                 | [-94.08]                    |
| cc-pCV6Z                                                              | -84.91                  | -17.87               | +9.94                 | -1.36                    | [-0.06]                | [-0.01]                   | [+0.00]                 | [-94.26]                    |
| CBS limit                                                             | [-84.91]                | [-18.16]             | [+9.98]               | [-1.35]                  | [-0.06]                | [-0.01]                   | [+0.00]                 | [-94.52]                    |
| $\Delta E = -94.52 + 12.13 - 0.11 + 0.14 = -82.36$ kcal mol $^{-1}$   |                         |                      |                       |                          |                        |                           |                         |                             |
| (c) $\text{HBH}(\text{H}_2)_2^+ \rightarrow D_{3h}$ scrambling TS     |                         |                      |                       |                          |                        |                           |                         |                             |
| cc-pCVDZ                                                              | +34.90                  | -12.13               | +2.27                 | -1.05                    | -0.09                  | -0.09                     | -0.01                   | [+23.81]                    |
| cc-pCVTZ                                                              | +35.30                  | -13.55               | +2.70                 | -1.43                    | -0.05                  | -0.11                     | [-0.01]                 | [+22.86]                    |
| cc-pCVQZ                                                              | +35.38                  | -13.99               | +2.79                 | -1.51                    | -0.03                  | [-0.11]                   | [-0.01]                 | [+22.53]                    |
| cc-pCV5Z                                                              | +35.39                  | -14.09               | +2.82                 | -1.53                    | [-0.03]                | [-0.11]                   | [-0.01]                 | [+22.44]                    |
| cc-pCV6Z                                                              | +35.39                  | -14.14               | +2.84                 | -1.54                    | [-0.03]                | [-0.11]                   | [-0.01]                 | [+22.40]                    |
| CBS limit                                                             | [+35.39]                | [-14.21]             | [+2.86]               | [-1.55]                  | [-0.03]                | [-0.11]                   | [-0.01]                 | [+22.34]                    |
| $\Delta E = 22.34 - 3.57 - 0.06 + 0.01 = +18.73$ kcal mol $^{-1}$     |                         |                      |                       |                          |                        |                           |                         |                             |
| (d) $\text{HBH}(\text{H}_2)_2^+ \rightarrow C_s$ scrambling TS        |                         |                      |                       |                          |                        |                           |                         |                             |
| cc-pCVDZ                                                              | +15.12                  | -5.85                | +0.88                 | -0.53                    | -0.04                  | -0.03                     | -0.00                   | [+9.54]                     |
| cc-pCVTZ                                                              | +15.39                  | -6.13                | +1.06                 | -0.64                    | -0.02                  | -0.04                     | [-0.00]                 | [+9.63]                     |
| cc-pCVQZ                                                              | +15.42                  | -6.24                | +1.10                 | -0.67                    | -0.01                  | [-0.04]                   | [-0.00]                 | [+9.56]                     |
| cc-pCV5Z                                                              | +15.42                  | -6.25                | +1.10                 | -0.67                    | [-0.01]                | [-0.04]                   | [-0.00]                 | [+9.55]                     |
| cc-pCV6Z                                                              | +15.42                  | -6.27                | +1.10                 | -0.67                    | [-0.01]                | [-0.04]                   | [-0.00]                 | [+9.53]                     |
| CBS limit                                                             | [+15.42]                | [-6.29]              | [+1.11]               | [-0.68]                  | [-0.01]                | [-0.04]                   | [-0.00]                 | [+9.51]                     |
| $\Delta E = 9.51 - 1.28 - 0.03 + 0.00 = +8.21$ kcal mol $^{-1}$       |                         |                      |                       |                          |                        |                           |                         |                             |

<sup>a</sup>The symbol  $\delta$  denotes the increment in the relative energy with respect to the preceding level of theory in the hierarchy  $\text{HF} \rightarrow \text{MP2} \rightarrow \text{CCSD} \rightarrow \text{CCSD(T)} \rightarrow \text{CCSDT} \rightarrow \text{CCSDT(Q)} \rightarrow \text{CCSDTQ}$ .

Square brackets signify results obtained from basis set extrapolations or additivity assumptions.

<sup>b</sup>Each final relative energy  $\Delta E$  is the sum of  $\Delta E_e[\text{CCSDTQ/CBS}]$ ,  $\Delta_{\text{ZPVE}}[\text{CCSD(T)}/\text{cc-pCVQZ}]$ ,  $\Delta_{\text{DBOC}}[\text{CCSD}/\text{cc-pCVQZ}]$ , and  $\Delta_{\text{rel}}[\text{CCSD(T)}/\text{cc-pCVQZ}]$ , listed in order.

### 3 Vibrational Frequencies

#### 3.1 CCSDTQ/CBS Geometries and Frequencies

As a gauge for estimating the quality of our CCSD(T)/cc-pCV5Z geometric parameters, we optimized the four smallest structures to the complete basis set (CBS) limit. This optimization was performed by the finite displacement of energy points using a 3-point formula, as generated by PSI4 and the Newton-Raphson approach. The absolute energy of each point was extrapolated to CCSDTQ/CBS via focal point analysis. The resulting optimized geometries for  $\text{B}(\text{H}_2)^+$ ,  $\text{B}(\text{H}_2)_2^+$ ,  $\text{HBH}^+$  and  $\text{HBH}(\text{H}_2)^+$  are shown in Figure S3, with cartesian coordinates listed in Table S14.

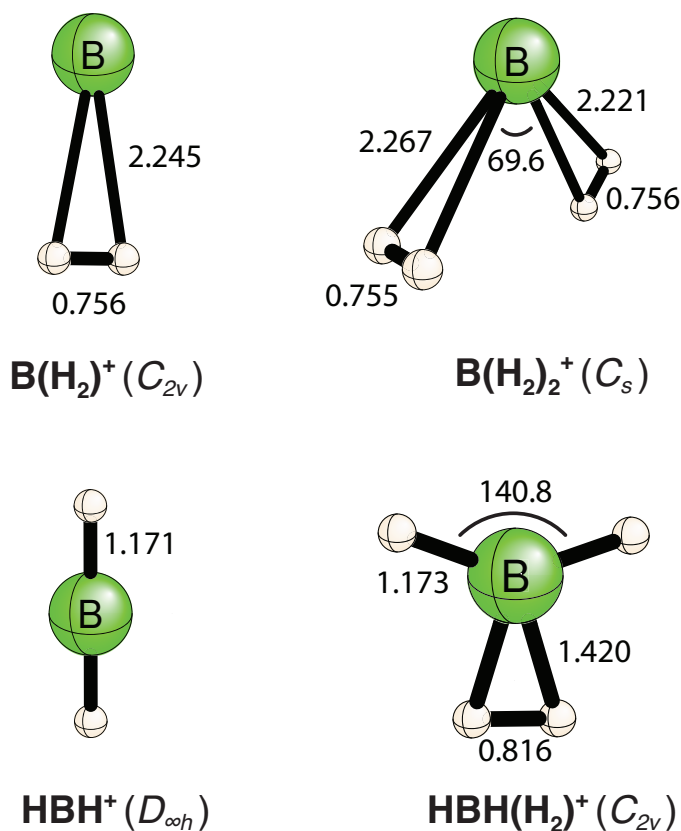

Figure S3: The optimized geometries (Å and degrees) of  $\text{B}(\text{H}_2)^+$ ,  $\text{B}(\text{H}_2)_2^+$ ,  $\text{HBH}^+$ , and  $\text{HBH}(\text{H}_2)^+$  obtained at CCSDTQ/CBS level of theory.

Table S14: Cartesian coordinates ( $\text{\AA}$ ) optimized at CCSDTQ/CBS level of theory.

| Atoms                          | X         | Y         | Z         |
|--------------------------------|-----------|-----------|-----------|
| (a) $\text{B}(\text{H}_2)^+$   |           |           |           |
| B                              | 0.000 00  | 0.000 00  | -0.342 45 |
| H                              | 0.000 00  | -0.378 04 | 1.870 58  |
| H                              | 0.000 00  | 0.378 04  | 1.870 58  |
| (b) $\text{B}(\text{H}_2)_2^+$ |           |           |           |
| B                              | 0.428 36  | 0.164 55  | 0.000 00  |
| H                              | -1.696 93 | 0.858 70  | 0.377 47  |
| H                              | -1.696 93 | 0.858 70  | -0.377 47 |
| H                              | -0.306 98 | -1.931 28 | 0.000 00  |
| H                              | -0.978 67 | -1.584 80 | 0.000 00  |
| (c) $\text{HBH}^+$             |           |           |           |
| B                              | 0.000 00  | 0.000 00  | 0.000 00  |
| H                              | 0.000 00  | 0.000 00  | -1.170 48 |
| H                              | 0.000 00  | 0.000 00  | 1.170 48  |
| (d) $\text{HBH}(\text{H}_2)^+$ |           |           |           |
| B                              | 0.000 00  | 0.000 00  | 0.129 64  |
| H                              | 1.104 91  | 0.000 00  | 0.522 54  |
| H                              | -1.104 91 | 0.000 00  | 0.522 54  |
| H                              | -0.408 08 | 0.000 00  | -1.230 66 |
| H                              | 0.408 08  | 0.000 00  | -1.230 66 |

The harmonic frequencies of  $\text{B}(\text{H}_2)^+$ ,  $\text{B}(\text{H}_2)_2^+$ ,  $\text{HBH}^+$ , and  $\text{HBH}(\text{H}_2)^+$ , are calculated from the hessian matrices, evaluated numerically using a 3-point formula. Each energy point was extrapolated to the CCSDTQ/CBS level. The results are shown in Table S15–S17.

Table S15: Harmonic vibrational frequencies ( $\text{cm}^{-1}$ ) of  $\text{B}(\text{H}_2)_2^+$  computed at the CCSDTQ/CBS level of theory.

| Symmetry | Modes      | Harmonic |
|----------|------------|----------|
| $a'$     | $\omega_1$ | 4214     |
|          | $\omega_2$ | 4200     |
|          | $\omega_3$ | 539      |
|          | $\omega_4$ | 407      |
|          | $\omega_5$ | 342      |
|          | $\omega_6$ | 238      |
| $a''$    | $\omega_7$ | 509      |
|          | $\omega_8$ | 152      |
|          | $\omega_9$ | 17       |

Table S16: Harmonic vibrational frequencies ( $\text{cm}^{-1}$ ) of  $\text{HBH}^+$  computed at the CCSDTQ/CBS level of theory.

| Symmetry     | Modes      | Harmonic |
|--------------|------------|----------|
| $\sigma_g^+$ | $\omega_1$ | 2689     |
| $\sigma_u^+$ | $\omega_2$ | 2975     |
| $\pi_u$      | $\omega_3$ | 1000     |
|              | $\omega_3$ | 1000     |

Table S17: Harmonic vibrational frequencies ( $\text{cm}^{-1}$ ) of  $\text{HBH}(\text{H}_2)^+$  computed at the CCSDTQ/CBS level of theory.

| Symmetry | Modes      | Harmonic |
|----------|------------|----------|
| $a_1$    | $\omega_1$ | 3490     |
|          | $\omega_2$ | 2700     |
|          | $\omega_3$ | 1257     |
|          | $\omega_4$ | 985      |
| $a_2$    | $\omega_5$ | 853      |
| $b_1$    | $\omega_6$ | 2901     |
|          | $\omega_7$ | 1661     |
|          | $\omega_8$ | 934      |
| $b_2$    | $\omega_9$ | 963      |

### 3.2 CCSD(T) Harmonic and Fundamental Vibrational Frequencies

Table S18: Harmonic and fundamental vibrational frequencies ( $\text{cm}^{-1}$ ), as well as corresponding infrared intensities (in parenthesis,  $\text{km mol}^{-1}$ ) of  $\text{B}(\text{H}_2)^+$  computed at the CCSD(T)/cc-pCVQZ level of theory, as compared to previous experimental<sup>a</sup> values.

| Symmetry | Modes   | Harmonic     | Fundamental | Poad et al. <sup>a</sup> |
|----------|---------|--------------|-------------|--------------------------|
| $a_1$    | $\nu_1$ | 4200 (282.5) | 3952        | 3940                     |
|          | $\nu_2$ | 351 (85.1)   | 309         | N/A                      |
| $b_2$    | $\nu_3$ | 517 (15.4)   | 442         | N/A                      |

<sup>a</sup>Experimental value from *J. Chem. Phys.* 2012, **137**, 124312.

Table S19: Harmonic vibrational frequencies ( $\text{cm}^{-1}$ ) and corresponding infrared intensities ( $\text{km mol}^{-1}$ ) of  $\text{B}(\text{H}_2)_2^+$  computed at the CCSD(T)/cc-pCVQZ level of theory.

| Symmetry | Modes      | Harmonic | Intensities |
|----------|------------|----------|-------------|
| $a'$     | $\omega_1$ | 4218     | 228.6       |
|          | $\omega_2$ | 4205     | 224.0       |
|          | $\omega_3$ | 520      | 6.8         |
|          | $\omega_4$ | 341      | 68.2        |
|          | $\omega_5$ | 323      | 56.1        |
|          | $\omega_6$ | 208      | 7.6         |
| $a''$    | $\omega_7$ | 499      | 14.5        |
|          | $\omega_8$ | 150      | 0.1         |
|          | $\omega_9$ | 33       | 0.4         |

Table S20: Harmonic vibrational frequencies ( $\text{cm}^{-1}$ ) and corresponding infrared intensities ( $\text{km mol}^{-1}$ ) of  $\text{B}(\text{H}_2)_3^+$  computed at the CCSD(T)/cc-pCVQZ level of theory.

| Symmetry | Modes         | Harmonic | Intensities |
|----------|---------------|----------|-------------|
| $a$      | $\omega_1$    | 4214     | 204.5       |
|          | $\omega_2$    | 513      | 2.9         |
|          | $\omega_3$    | 325      | 53.3        |
|          | $\omega_4$    | 231      | 22.7        |
|          | $\omega_5$    | 200      | 0.0         |
| $e$      | $\omega_6$    | 4214     | 179.3       |
|          | $\omega_7$    | 4214     | 179.3       |
|          | $\omega_8$    | 504      | 8.5         |
|          | $\omega_9$    | 504      | 8.5         |
|          | $\omega_{10}$ | 317      | 40.5        |
|          | $\omega_{11}$ | 317      | 40.5        |
|          | $\omega_{12}$ | 211      | 2.5         |
|          | $\omega_{13}$ | 211      | 2.5         |
|          | $\omega_{14}$ | 115      | 0.4         |
|          | $\omega_{15}$ | 115      | 0.4         |

Table S21: Harmonic and fundamental vibrational frequencies ( $\text{cm}^{-1}$ ) and corresponding infrared intensities ( $\text{km mol}^{-1}$ ) of  $\text{HBH}^+$  computed using VPT2 method at the CCSD(T)/cc-pCVQZ level of theory.

| Symmetry     | Modes      | Harmonic | Intensities | Fundamental | Intensities |
|--------------|------------|----------|-------------|-------------|-------------|
| $\sigma_g^+$ | $\omega_1$ | 2690     | 0.0         | 2601        | 0.0         |
| $\sigma_u^+$ | $\omega_2$ | 2976     | 98.6        | 2865        | 99.9        |
| $\pi_u$      | $\omega_3$ | 998      | 4.4         | 989         | 2.8         |
|              | $\omega_3$ | 998      | 4.4         | 989         | 2.8         |

Table S22: Harmonic vibrational frequencies ( $\text{cm}^{-1}$ ) and corresponding infrared intensities ( $\text{km mol}^{-1}$ ) of  $\text{HBH}(\text{H}_2)^+$  computed at the CCSD(T)/cc-pCVQZ level of theory.

| Symmetry | Modes      | Harmonic | Intensities |
|----------|------------|----------|-------------|
| $a_1$    | $\omega_1$ | 3503     | 52.5        |
|          | $\omega_2$ | 2703     | 9.2         |
|          | $\omega_3$ | 1254     | 6.5         |
|          | $\omega_4$ | 982      | 3.2         |
| $a_2$    | $\omega_5$ | 847      | 0.0         |
| $b_1$    | $\omega_6$ | 2903     | 50.9        |
|          | $\omega_7$ | 1652     | 52.3        |
|          | $\omega_8$ | 935      | 28.3        |
| $b_2$    | $\omega_9$ | 966      | 0.0         |

Table S23: Harmonic vibrational frequencies ( $\text{cm}^{-1}$ ) and corresponding infrared intensities ( $\text{km mol}^{-1}$ ) of  $\text{HBH}(\text{H}_2)_2^+$  computed at the CCSD(T)/cc-pCVQZ level of theory.

| Symmetry | Modes         | Harmonic | Intensities |
|----------|---------------|----------|-------------|
| $a_1$    | $\omega_1$    | 3430     | 1.9         |
|          | $\omega_2$    | 2660     | 21.8        |
|          | $\omega_3$    | 1321     | 17.8        |
|          | $\omega_4$    | 1075     | 0.0         |
|          | $\omega_5$    | 830      | 65.2        |
| $a_2$    | $\omega_6$    | 1830     | 0.0         |
|          | $\omega_7$    | 1066     | 0.0         |
|          | $\omega_8$    | 665      | 0.0         |
| $b_1$    | $\omega_9$    | 2781     | 54.5        |
|          | $\omega_{10}$ | 1867     | 117.1       |
|          | $\omega_{11}$ | 907      | 54.7        |
|          | $\omega_{12}$ | 529      | 65.1        |
| $b_2$    | $\omega_{13}$ | 3369     | 52.4        |
|          | $\omega_{14}$ | 1302     | 13.8        |
|          | $\omega_{15}$ | 1058     | 2.4         |



Table S24: Harmonic vibrational frequencies ( $\text{cm}^{-1}$ ) and corresponding infrared intensities ( $\text{km mol}^{-1}$ ) of the  $C_{2v}$  transition state for  $\text{B}(\text{H}_2)_2^+ \rightarrow \text{HBH}(\text{H}_2)^+$  computed at the CCSD(T)/cc-pCVQZ level of theory.

| Symmetry | Modes      | Harmonic      | Intensities |
|----------|------------|---------------|-------------|
| $a_1$    | $\omega_1$ | 1192 <i>i</i> | 59.3        |
|          | $\omega_2$ | 2263          | 47.5        |
|          | $\omega_3$ | 1516          | 14.4        |
|          | $\omega_4$ | 793           | 29.8        |
| $a_2$    | $\omega_5$ | 1011          | 0.0         |
| $b_1$    | $\omega_6$ | 888           | 0.2         |
| $b_2$    | $\omega_7$ | 2711          | 14.6        |
|          | $\omega_8$ | 1684          | 57.7        |
|          | $\omega_9$ | 1160          | 53.0        |

Table S25: Harmonic vibrational frequencies ( $\text{cm}^{-1}$ ) and corresponding infrared intensities ( $\text{km mol}^{-1}$ ) of the  $C_{3v}$  transition state for  $\text{B}(\text{H}_2)_3^+ \rightarrow \text{HBH}(\text{H}_2)_2^+$  computed at the CCSD(T)/cc-pCVQZ level of theory.

| Symmetry | Modes         | Harmonic     | Intensities |
|----------|---------------|--------------|-------------|
| $a_1$    | $\omega_1$    | 506 <i>i</i> | 75.2        |
|          | $\omega_2$    | 3700         | 68.9        |
|          | $\omega_3$    | 865          | 21.2        |
|          | $\omega_4$    | 623          | 0.8         |
| $a_2$    | $\omega_5$    | 359          | 0.0         |
| $e$      | $\omega_6$    | 3797         | 130.2       |
|          | $\omega_7$    | 3797         | 130.2       |
|          | $\omega_8$    | 824          | 1.1         |
|          | $\omega_9$    | 824          | 1.1         |
|          | $\omega_{10}$ | 631          | 48.4        |
|          | $\omega_{11}$ | 631          | 48.4        |
|          | $\omega_{12}$ | 587          | 0.0         |
|          | $\omega_{13}$ | 587          | 0.0         |
|          | $\omega_{14}$ | 335          | 4.6         |
|          | $\omega_{15}$ | 335          | 4.6         |

Table S26: Harmonic vibrational frequencies ( $\text{cm}^{-1}$ ) and corresponding infrared intensities ( $\text{km mol}^{-1}$ ) of the  $D_{3h}$  hydrogen scrambling transition state for  $\text{HBH}(\text{H}_2)_2^+$  computed at the CCSD(T)/cc-pCVQZ level of theory.

| Symmetry | Modes         | Harmonic      | Intensities |
|----------|---------------|---------------|-------------|
| $a'_1$   | $\omega_1$    | 2325          | 0.0         |
|          | $\omega_2$    | 1528          | 0.0         |
| $a''_1$  | $\omega_3$    | 1225          | 0.0         |
| $a''_2$  | $\omega_4$    | 2579          | 320.0       |
|          | $\omega_5$    | 503           | 345.9       |
| $e'$     | $\omega_6$    | 1069 <i>i</i> | 725.9       |
|          | $\omega_7$    | 1069 <i>i</i> | 725.9       |
|          | $\omega_8$    | 2592          | 129.5       |
|          | $\omega_9$    | 2592          | 129.5       |
|          | $\omega_{10}$ | 902           | 18.1        |
| $e''$    | $\omega_{11}$ | 902           | 18.1        |
|          | $\omega_{12}$ | 2479          | 0.0         |
|          | $\omega_{13}$ | 2479          | 0.0         |
|          | $\omega_{14}$ | 1041          | 0.0         |
|          | $\omega_{15}$ | 1041          | 0.0         |

Table S27: Harmonic vibrational frequencies ( $\text{cm}^{-1}$ ) and corresponding infrared intensities ( $\text{km mol}^{-1}$ ) of the  $C_s$  hydrogen scrambling transition state for  $\text{HBH}(\text{H}_2)_2^+$  computed at the CCSD(T)/cc-pCVQZ level of theory.

| Symmetry | Modes         | Harmonic      | Intensities |
|----------|---------------|---------------|-------------|
| $a'$     | $\omega_1$    | 3299          | 24.5        |
|          | $\omega_2$    | 2836          | 48.6        |
|          | $\omega_3$    | 2489          | 63.5        |
|          | $\omega_4$    | 2342          | 28.0        |
|          | $\omega_5$    | 1466          | 34.2        |
|          | $\omega_6$    | 1366          | 11.0        |
|          | $\omega_7$    | 1145          | 5.5         |
|          | $\omega_8$    | 995           | 5.4         |
|          | $\omega_9$    | 860           | 68.1        |
| $a''$    | $\omega_{10}$ | 1189 <i>i</i> | 453.3       |
|          | $\omega_{11}$ | 2420          | 52.9        |
|          | $\omega_{12}$ | 1924          | 64.1        |
|          | $\omega_{13}$ | 1159          | 4.7         |
|          | $\omega_{14}$ | 954           | 3.7         |
|          | $\omega_{15}$ | 564           | 77.6        |

## 4 Molecular Orbital Analysis

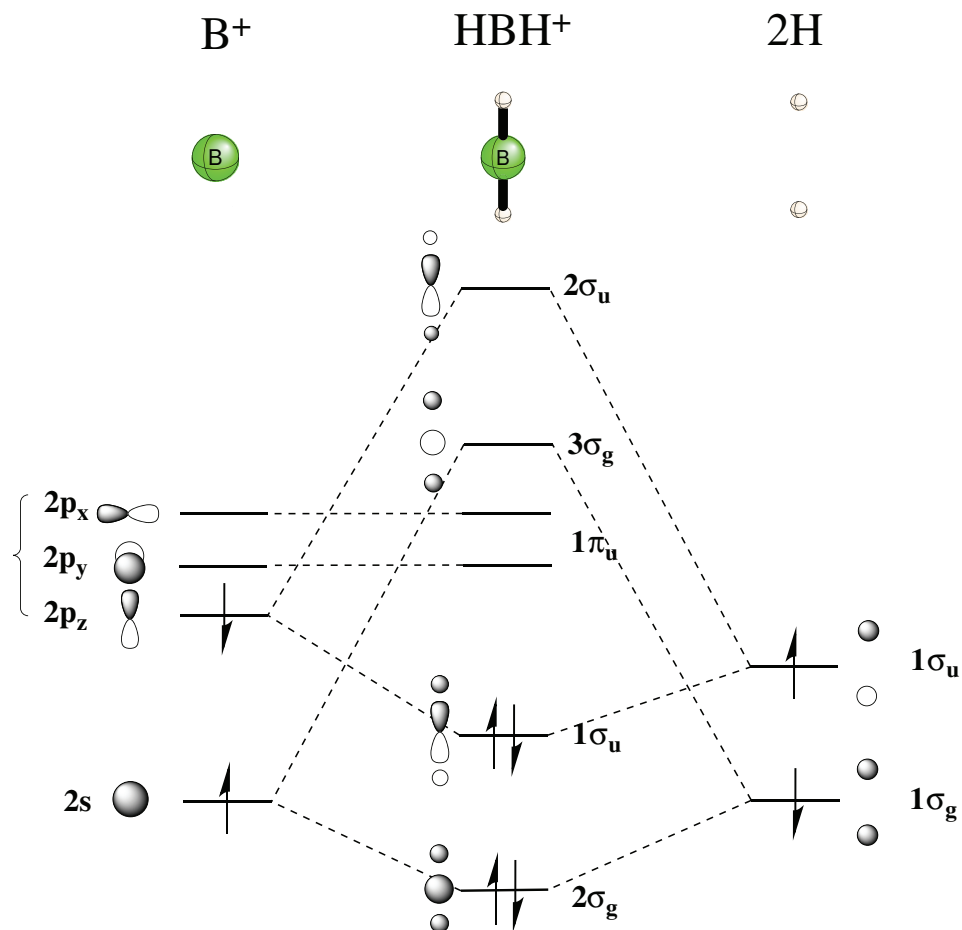

Figure S4: Orbital correlation diagram for the formation of  $\text{HBH}^+$  from  $\text{B}^+$  and two  $\text{H}$  fragments. The curly brace on the left indicates the degeneracy of  $\text{B}^+$   $2p$  orbitals.

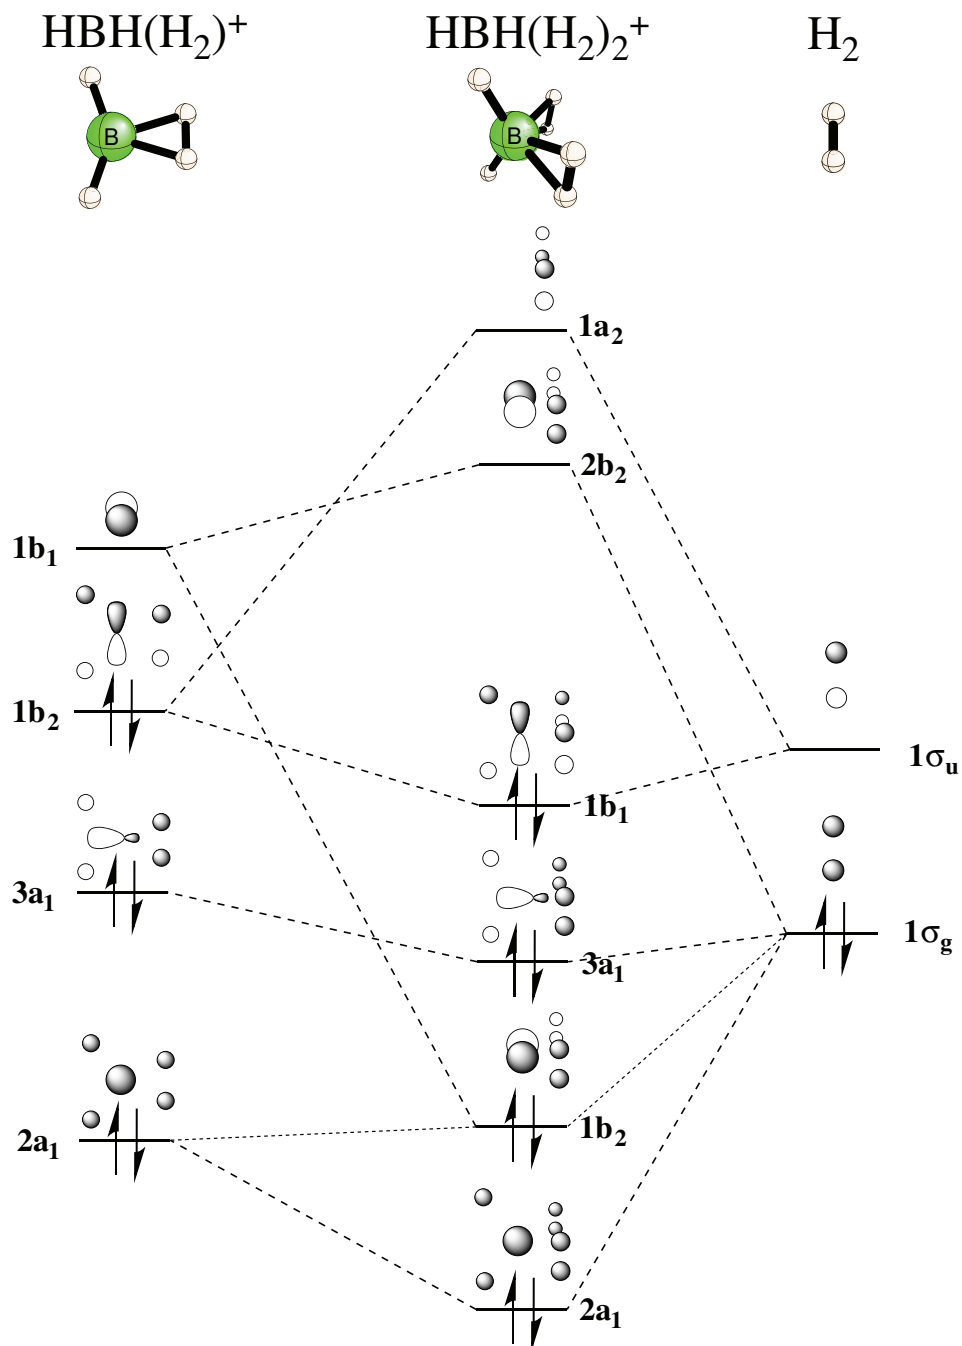

Figure S5: Orbital correlation diagram for the formation of  $\text{HBH}(\text{H}_2)_2^+$  from  $\text{HBH}(\text{H}_2)^+$  and  $\text{H}_2$  fragments. Large contributions of fragment orbitals are indicated by the dashed lines, while small contributions are depicted by the dotted lines.

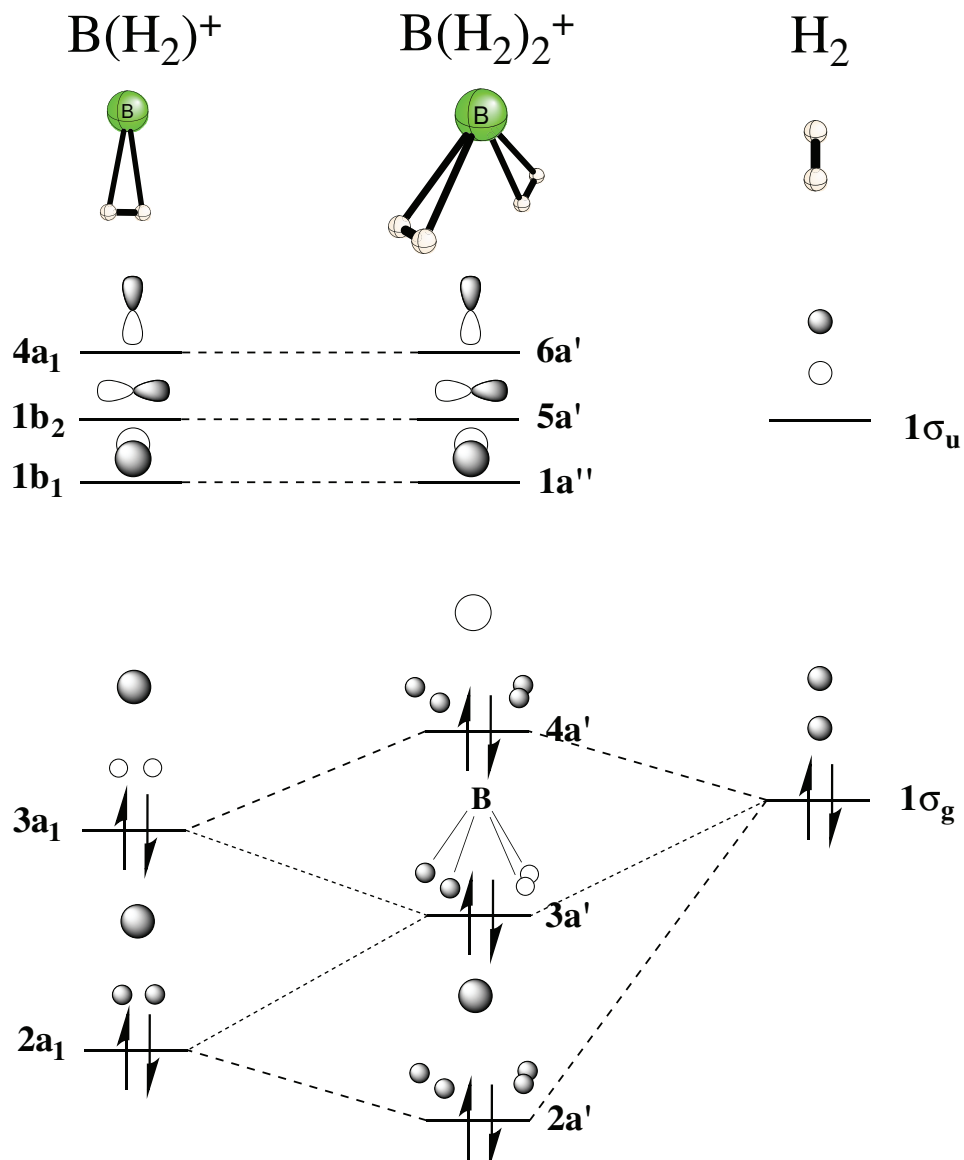

Figure S6: Orbital correlation diagram for the formation of  $\text{B(H}_2\text{)}_2^+$  from  $\text{B(H}_2\text{)}^+$  and  $\text{H}_2$  fragments. Large contributions of fragment orbitals are indicated by the dashed lines, while small contributions are depicted by the dotted lines. The interaction between the  $3a'$  and  $5a'$  orbitals of  $\text{B(H}_2\text{)}_2^+$  provides critical stabilization for the H-H  $\sigma$  bond activation process.

## 5 Intrinsic Reaction Coordinates

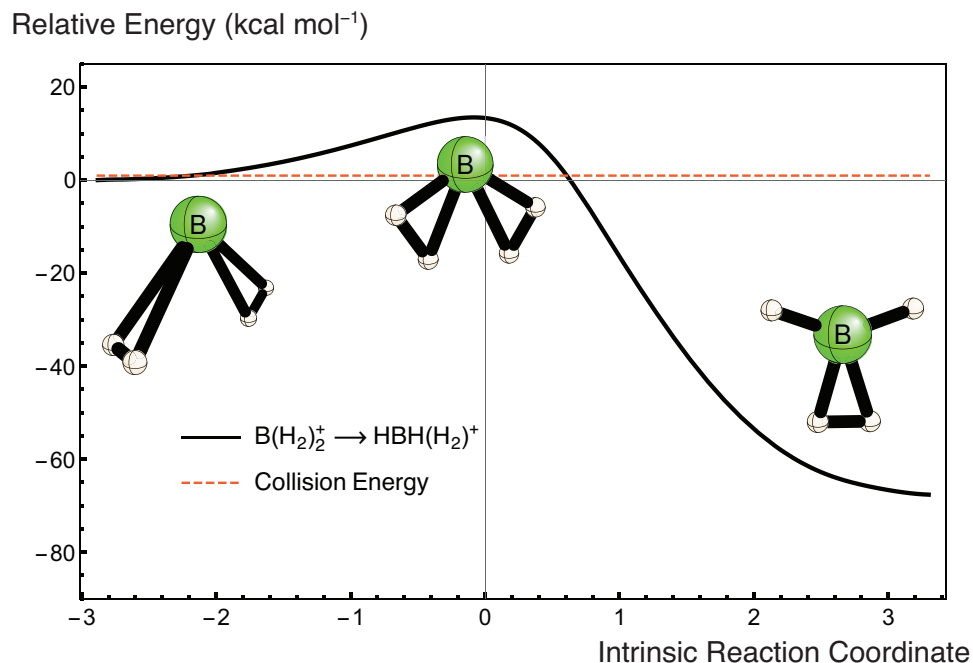

Figure S7: Complete potential energy curve along the intrinsic reaction path (IRP) for the insertion reaction of  $\text{B}(\text{H}_2)_2^+$ . The geometric structures and zero-point vibrational corrections along the path were generated at the AE-CCSD(T)/cc-pCVTZ level of theory. Final energetics were determined from AE-CCSD(T)/cc-pCV5Z single points along the IRP. The abscissa is the intrinsic reaction coordinate (in units of  $\text{u}^{1/2} \text{ bohr}$ ) along the path in mass-weighted Cartesian coordinates.

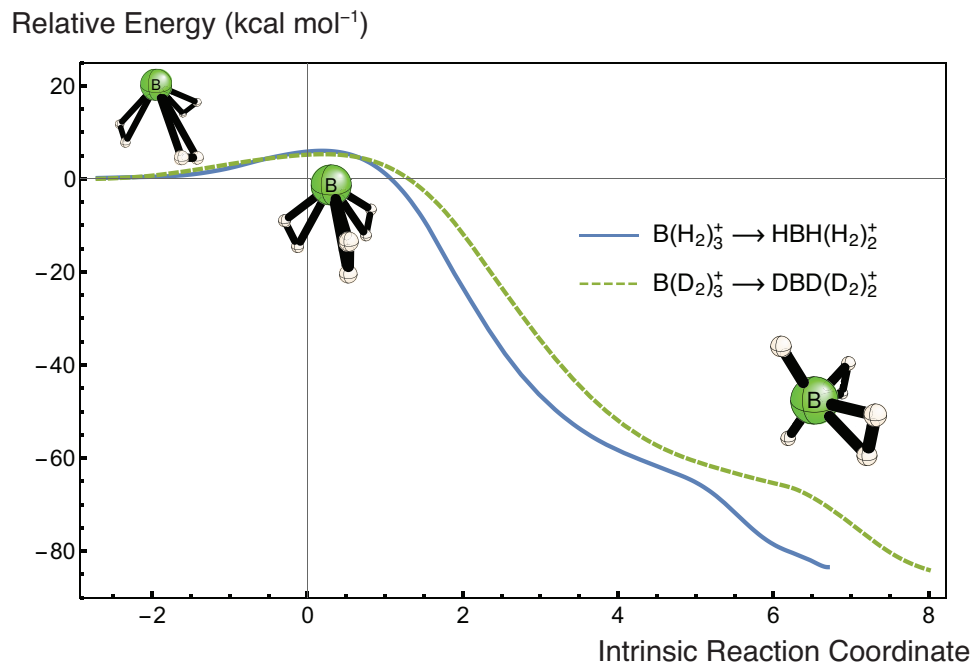

Figure S8: Complete potential energy curves along the intrinsic reaction path (IRP) for the indicated insertion reactions. The geometric structures and zero-point vibrational corrections along the path were generated at the AE-CCSD(T)/cc-pCVTZ level of theory. Final energetics were determined from AE-CCSD(T)/cc-pCV5Z single points along the IRP. The abscissa is the intrinsic reaction coordinate (in units of  $u^{1/2}$  bohr) along the path in mass-weighted Cartesian coordinates. The shoulder in the product region is caused by disturbance from the H/D scrambling modes.



Table S28: Key parameters and results from the tunneling analysis using WKB and exact scattering methods for the insertion reactions  $\text{B}(\text{H}_2)_3^+ \rightarrow \text{HBH}(\text{H}_2)_2^+$  and  $\text{B}(\text{D}_2)_3^+ \rightarrow \text{DBD}(\text{D}_2)_2^+$ .

| $\text{B}(\text{H}_2)_3^+ \rightarrow \text{HBH}(\text{H}_2)_2^+$    | $\text{B}(\text{D}_2)_3^+ \rightarrow \text{DBD}(\text{D}_2)_2^+$    |
|----------------------------------------------------------------------|----------------------------------------------------------------------|
| (a) WKB                                                              |                                                                      |
| Collision energy ( $\epsilon$ ) = 0.47 kcal mol <sup>-1</sup>        | Collision energy ( $\epsilon$ ) = 0.37 kcal mol <sup>-1</sup>        |
| Collision frequency ( $\omega_0$ ) = 332 cm <sup>-1</sup>            | Collision frequency ( $\omega_0$ ) = 261 cm <sup>-1</sup>            |
| Barrier = 6.07 kcal mol <sup>-1</sup>                                | Barrier = 5.10 kcal mol <sup>-1</sup>                                |
| Turning points (s1, s2) = (-2.00, 1.05) u <sup>1/2</sup> bohr        | Turning points (s1, s2) = (-2.52, 1.24) u <sup>1/2</sup> bohr        |
| Effective barrier frequency = 658i cm <sup>-1</sup>                  | Effective barrier frequency = 397i cm <sup>-1</sup>                  |
| Barrier penetration integral ( $\theta$ ) = 11.47                    | Barrier penetration integral ( $\theta$ ) = 13.52                    |
| Transmission probability ( $P_{\text{H}}$ ) = $1.10 \times 10^{-10}$ | Transmission probability ( $P_{\text{D}}$ ) = $1.80 \times 10^{-12}$ |
| Pure Tunneling half-life ( $\tau$ ) = $6.34 \times 10^{-4}$ s        | Pure Tunneling half-life ( $\tau$ ) = $4.91 \times 10^{-2}$ s        |
| (b) Exact Scattering                                                 |                                                                      |
| Transmission probability ( $P_{\text{H}}$ ) = $8.54 \times 10^{-11}$ | Transmission probability ( $P_{\text{D}}$ ) = $1.59 \times 10^{-12}$ |
| Pure Tunneling half-life ( $\tau$ ) = $8.16 \times 10^{-4}$ s        | Pure Tunneling half-life ( $\tau$ ) = $5.56 \times 10^{-2}$ s        |

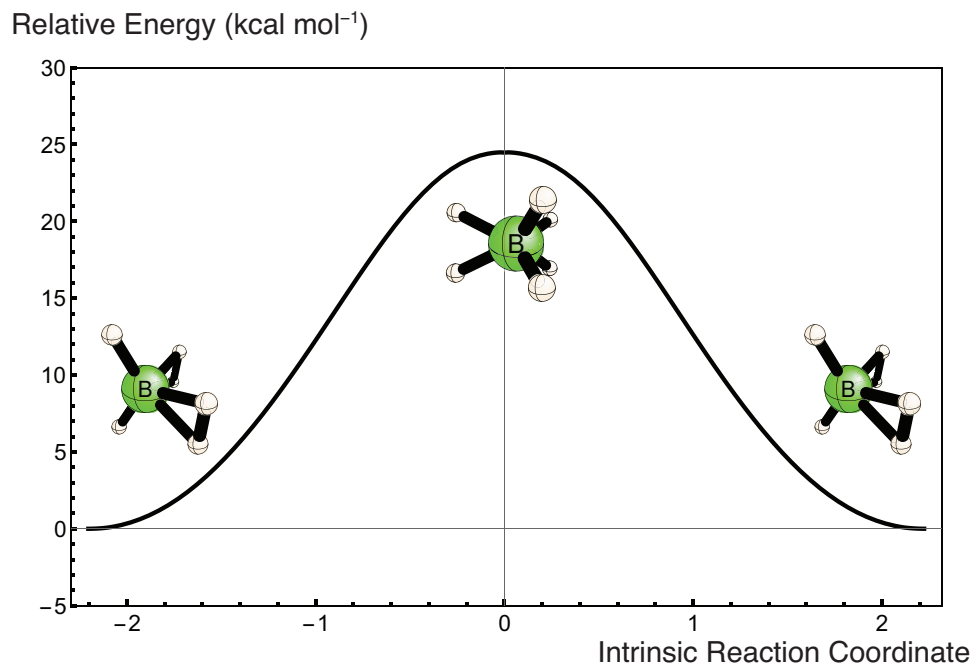

Figure S9: Intrinsic reaction path (IRP) for the hydrogen scrambling reaction of  $\text{HBH}(\text{H}_2)_2^+$  through the  $D_{3h}$  transition state, computed at AE-CCSD/cc-pCVTZ level. The abscissa is the intrinsic reaction coordinate (in units of u<sup>1/2</sup> bohr) along the path in mass-weighted Cartesian coordinates.

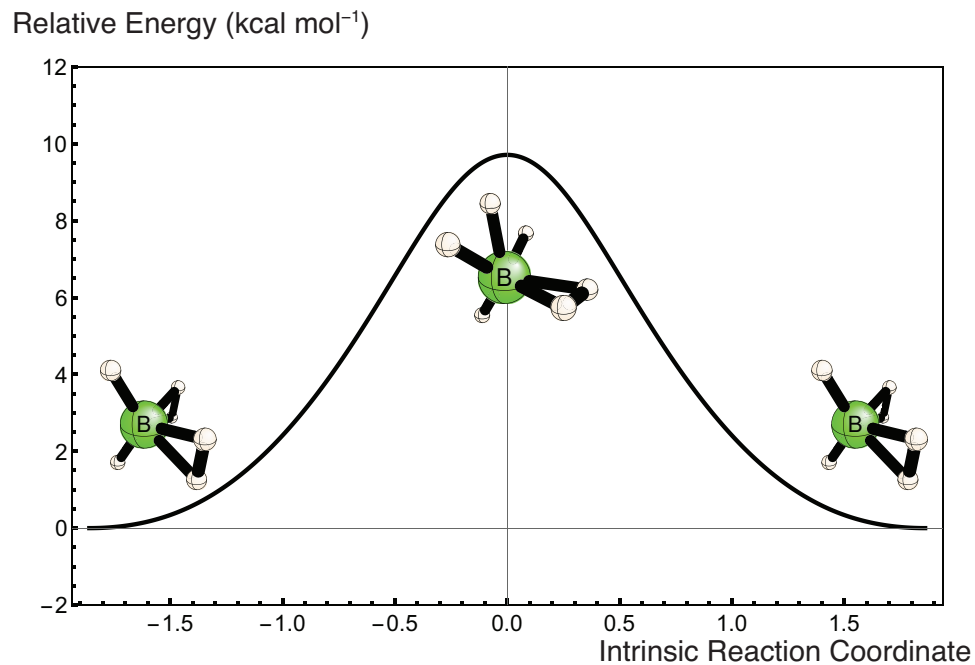

Figure S10: Intrinsic reaction path (IRP) for the hydrogen scrambling reaction of  $\text{HBH}(\text{H}_2)_2^+$  through the  $C_s$  transition state, computed at AE-CCSD/cc-pCVTZ level. The abscissa is the intrinsic reaction coordinate (in units of  $\text{u}^{1/2}$  bohr) along the path in mass-weighted Cartesian coordinates.

## 6 Tunneling Analyses

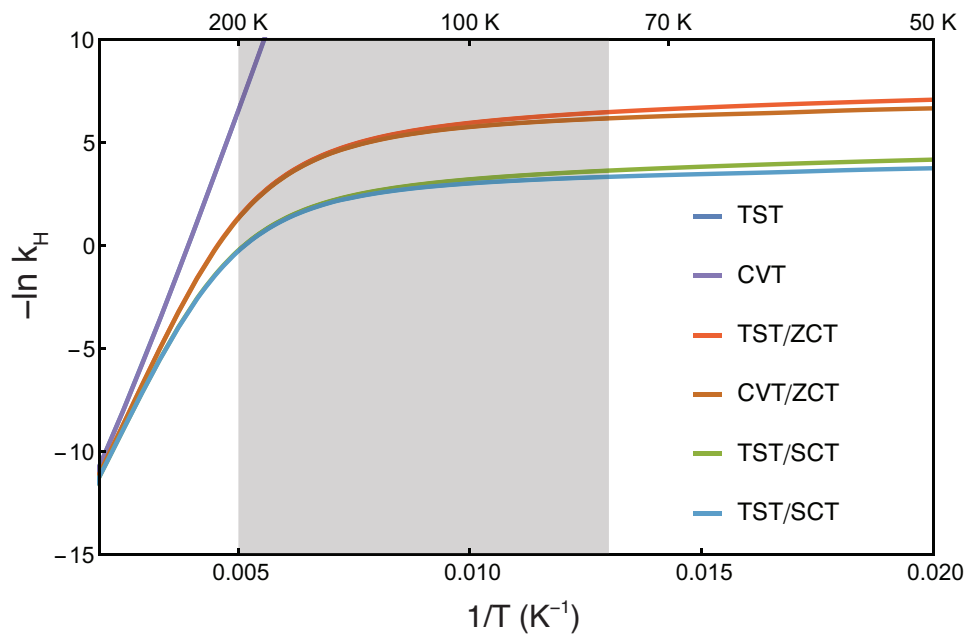

Figure S11: Arrhenius plot of rate constants for the insertion reaction  $\text{B}(\text{H}_2)_2^+ \rightarrow \text{HBH}(\text{H}_2)^+$ , obtained by conventional transition state theory (TST) or canonical variational transition state theory (CVT), each with zero-curvature tunneling (ZCT) and small-curvature tunneling (SCT). The grey area indicates the experimental temperature range of the overall insertion reaction rate.

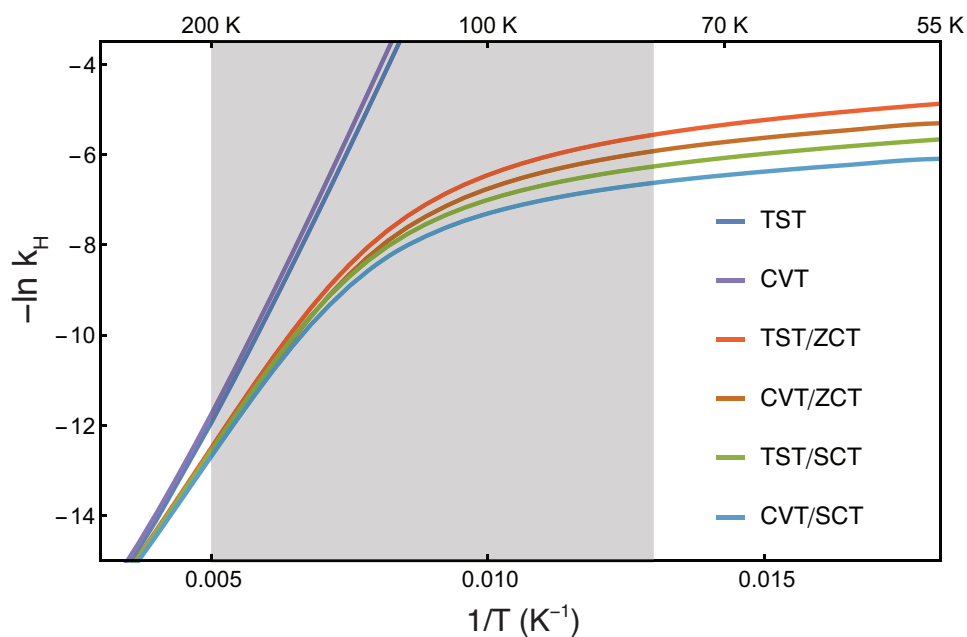

Figure S12: Arrhenius plot for the insertion reaction  $\text{B}(\text{H}_2)_3^+ \rightarrow \text{HBH}(\text{H}_2)_2^+$ , obtained by conventional transition state theory (TST) or canonical variational transition state theory (CVT), each with zero-curvature tunneling (ZCT) and small-curvature tunneling (SCT). The grey area indicates the experimental temperature range of the overall insertion reaction rate.

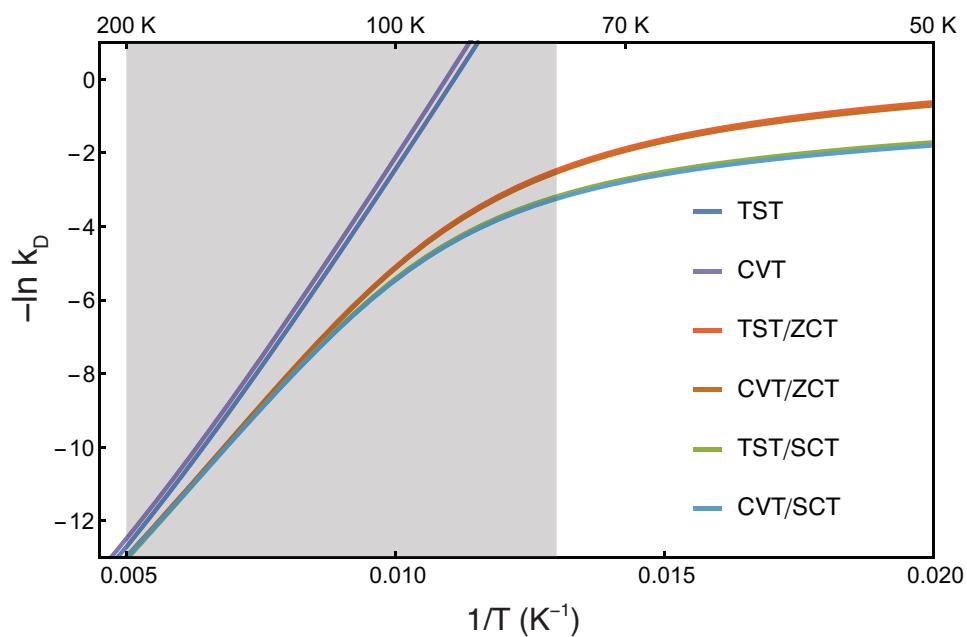

Figure S13: Arrhenius plot for the insertion reaction  $\text{B}(\text{D}_2)_3^+ \rightarrow \text{DBD}(\text{D}_2)_2^+$ , obtained by conventional transition state theory (TST) or canonical variational transition state theory (CVT), each with zero-curvature tunneling (ZCT) and small-curvature tunneling (SCT). The grey area indicates the experimental temperature range of the overall insertion reaction rate.

## 7 Estimation of $[\text{B}(\text{H}_2)_3^+]/[\text{B}(\text{H}_2)_2^+]$ Ratio under Experimental Conditions

Considering the experimental environment of Kemper and coworkers' rate constant measurements (Fig. 6 in Kemper, P. R.; Bushnell, J. E.; Weis, P.; Bowers, M. T. *J. Am. Chem. Soc.* 1998, 120, 7577–7584.), the temperature range is 75 K – 200 K, and the  $\text{H}_2$  pressure = 2 torr = 0.0026 atm.

Based on the data in Table 1 of this paper, we assume for the binding reactions  $\text{B}(\text{H}_2)_{n-1}^+ + \text{H}_2 \rightarrow \text{B}(\text{H}_2)_n^+$  the entropy change  $\Delta S \approx 14 \text{ cal mol}^{-1} \text{ K}^{-1}$ . Taking the experimental enthalpy change  $\Delta H = -3.4 \text{ kcal mol}^{-1}$  for  $\text{B}(\text{H}_2)^+ + \text{H}_2 \rightarrow \text{B}(\text{H}_2)_2^+$ , appended by our computed binding energy difference between  $\text{B}(\text{H}_2)_2^+$  and  $\text{B}(\text{H}_2)_3^+$  ( $2.9 - 2.5 = 0.4 \text{ kcal mol}^{-1}$ ), we estimate the enthalpy change for binding reaction  $\text{B}(\text{H}_2)_2^+ + \text{H}_2 \rightarrow \text{B}(\text{H}_2)_3^+$  as

$$\Delta H = -3.4 + 0.4 = -3.0 \text{ kcal mol}^{-1}, \quad n = 3 \quad (1)$$

For each temperature T, we estimate the Gibbs free energy change using

$$\Delta G_T = \Delta H - T\Delta S \quad (2)$$

Then, based on the fact that rapid equilibrium was established between all reactants  $\text{B}(\text{H}_2)_n^+$ , the  $[\text{B}(\text{H}_2)_3^+]/[\text{B}(\text{H}_2)_2^+]$  ratio is obtained by the following relations:

$$\Delta G_T = -RT \ln K_{eq} \quad (3)$$

$$\ln K_{eq} = \frac{[\text{B}(\text{H}_2)_3^+]}{[\text{B}(\text{H}_2)_2^+][\text{H}_2]} \quad (4)$$

The results are shown in Table S29. Our estimation shows the  $[\text{B}(\text{H}_2)_3^+]/[\text{B}(\text{H}_2)_2^+]$  ratio is larger than 0.004 in the experimental temperature range. Even if our estimated  $\Delta G$  has

an error of 0.5 kcal mol<sup>-1</sup>, the [B(H<sub>2</sub>)<sub>3</sub><sup>+</sup>]/[B(H<sub>2</sub>)<sub>2</sub><sup>+</sup>] ratio still remains larger than 0.001.

Table S29: Estimation of [B(H<sub>2</sub>)<sub>3</sub><sup>+</sup>]/[B(H<sub>2</sub>)<sub>2</sub><sup>+</sup>] Ratio Under Experimental Conditions

| Temperature (K) | $\Delta G_T$ (kcal mol <sup>-1</sup> ) | [B(H <sub>2</sub> ) <sub>3</sub> <sup>+</sup> ]/[B(H <sub>2</sub> ) <sub>2</sub> <sup>+</sup> ] |
|-----------------|----------------------------------------|-------------------------------------------------------------------------------------------------|
| 70              | -2.02                                  | 5330                                                                                            |
| 80              | -1.88                                  | 360                                                                                             |
| 90              | -1.74                                  | 44.2                                                                                            |
| 100             | -1.60                                  | 8.26                                                                                            |
| 110             | -1.46                                  | 2.09                                                                                            |
| 120             | -1.32                                  | 0.667                                                                                           |
| 130             | -1.18                                  | 0.253                                                                                           |
| 140             | -1.04                                  | 0.111                                                                                           |
| 150             | -0.90                                  | 0.0539                                                                                          |
| 160             | -0.76                                  | 0.0287                                                                                          |
| 170             | -0.62                                  | 0.0165                                                                                          |
| 180             | -0.48                                  | 0.0101                                                                                          |
| 190             | -0.34                                  | 0.00648                                                                                         |
| 200             | -0.20                                  | 0.00435                                                                                         |

# 8 Details for the Active Space of $\text{BH}_2^+$ PES

As shown in Table S30, the leading CI coefficients from all-electron/full-valence CAS(6,7) computations indicate that the single-reference reactant  $\text{B}(\text{H}_2)^+$  ( $S = -5$ ) gradually converted into the two-configurational TS ( $S = 0$ ), then further merged to the single-reference product  $\text{HBH}^+$  ( $S = +2$ ). Therefore, a CAS(2,2) reference including the two active orbitals from the open-shell singlet TS is sufficient to describe the PES of  $\text{BH}_2^+$  in an Mk-MRCCSD(T) computation.

Table S30: Leading CI coefficients ( $C_i$ ) in the CASPT2/cc-pCVQZ wave functions along the  $\text{B}(\text{H}_2)^+ \rightarrow \text{HBH}^+$  Intrinsic Reaction Path<sup>a</sup>

| $S^a$ ( $\text{u}^{1/2}$ bohr) | CAS(6,7) |       |       |       |
|--------------------------------|----------|-------|-------|-------|
|                                | $C_1$    | $C_2$ | $C_3$ | $C_4$ |
| −5.82                          | 0.95     | −0.17 | −0.17 | −0.15 |
| −5.14                          | 0.95     | −0.17 | −0.17 | −0.15 |
| −4.75                          | 0.95     | −0.17 | −0.17 | −0.15 |
| −4.14                          | 0.95     | −0.17 | −0.17 | −0.14 |
| −3.77                          | 0.95     | −0.17 | −0.17 | −0.14 |
| −3.14                          | 0.93     | −0.20 | −0.15 | −0.15 |
| −2.42                          | 0.89     | −0.37 | −0.08 | −0.08 |
| −1.80                          | 0.84     | −0.50 | −0.06 | −0.06 |
| −1.40                          | 0.81     | −0.55 | −0.06 | −0.06 |
| −0.99                          | 0.77     | −0.62 | −0.06 | −0.06 |
| −0.56                          | 0.75     | −0.64 | −0.06 | −0.06 |
| −0.22                          | 0.73     | −0.66 | −0.06 | −0.06 |
| +0.00                          | 0.71     | −0.68 | −0.06 | −0.06 |
| +0.23                          | 0.72     | −0.68 | −0.06 | −0.06 |
| +0.53                          | 0.80     | −0.58 | −0.06 | −0.06 |
| +0.99                          | 0.94     | −0.30 | −0.08 | −0.07 |
| +1.46                          | 0.98     | −0.10 | −0.08 | −0.07 |
| +1.76                          | 0.99     | −0.07 | −0.07 | −0.06 |

<sup>a</sup> $S$  is the intrinsic reaction coordinate (in units of  $\text{u}^{1/2}$  bohr) along the path in mass-weighted Cartesian coordinates



## 9 Example Keywords and Parameters in Polyrate Computations

Table S31: Example keywords and parameters in Polyrate computations.

| poly.fu5  |          | poly.fu40  |         |
|-----------|----------|------------|---------|
| *PATH     |          | *gen40     |         |
| NSTEPS    | 500      | curvature  | compute |
| COORD     | cart     | gradder    | noextra |
| RPM       | ESD      | freqsource | hessian |
| INH       | 1        | hessform   | full    |
| SADDLE    | yes      | anharm     | none    |
| HESS      | off      | maxlpts    | 3       |
| SSTEP     | 0.03     |            |         |
| CURV      | dgrad    |            |         |
| FIRSTSTEP | nmode    |            |         |
| SIGN      | reactant |            |         |
